# Supplementary material for: Epoxy/polysiloxane intimate intermixing networks driven by intrinsic motive force to achieve ultralow-temperature damping properties
Source: Royal Society of Chemistry journal article supplement (doi:10.1039/c7ta04894g), 2017-01-01
Supplement: c7ta04894g1.pdf [file c7ta04894g1.pdf]

## Supporting Information

### Epoxy/Polysiloxane Intimate Intermixing Networks Driven by Intrinsic Motive Force to Achieve their Potential Ultralow-Temperature Damping Applications

Yan Li, Qingsong Lian, Zhengrong Lin, Jue Cheng\*, and Junying Zhang\*

Beijing Advanced Innovation Center for Soft Matter Science and Engineering,

Beijing University of Chemical Technology, Beijing 100029, China

Email Address: chengjue@mail.buct.edu.cn; zhangjy@mail.buct.edu.cn

#### Table of contents

**Table S1.** The epoxy value of DADGEBA and SH-EP

| Sample code | Calculated epoxy value (mol /100g) | Experimental epoxy value (mol /100g) |
|-------------|------------------------------------|--------------------------------------|
| DADGEBA     | 0.458 <sup>a</sup>                 | 0.461 <sup>c</sup>                   |
| SH-EP       | 0.238 <sup>b</sup>                 | 0.232 <sup>c</sup>                   |

<sup>a</sup>The calculated epoxy value of DADGEBA was determined by <sup>1</sup>H-NMR.

<sup>b</sup>The calculated epoxy value of SH-EP was determined by the experimental epoxy value and the weight ratios of DADGEBA.

<sup>c</sup>The experimental epoxy value was determined by titration.

**Table S2.** Formulation of SH-EP and Si-EP

| Sample code | Content (g) |              |                        |
|-------------|-------------|--------------|------------------------|
|             | DADGEBA     | $\gamma$ -SH | Trimethoxypropylsilane |
| SH-EP       | 100         | 105.50       | ---                    |
| Si-EP       | 100         | ---          | 87.74                  |

SH-EP is obtained by the click reaction, while Si-EP is obtained by mixing raw materials together.

Note that both SH-EP and Si-EP have the same molar mass of alkoxy groups.

**Table S3.** Formulation of SH-EP-40 and Si-EP-40 networks

| <b>Content (g)</b> |              |              |             |                |                              |
|--------------------|--------------|--------------|-------------|----------------|------------------------------|
|                    | <b>SH-EP</b> | <b>Si-EP</b> | <b>D230</b> | <b>PDMS-OH</b> | <b>DBTDL<sup>a</sup> (%)</b> |
| <b>Sample code</b> |              |              |             |                |                              |
| SH-EP-40           | 100          | 0            | 14.50       | 40             | 0.1                          |
| Si-EP-40           | 0            | 100          | 14.46       | 40             | 0.1                          |

<sup>a</sup>The weight of DBTDL on the basis of the weight of PDMS-OH is 0.1 %.

Note that the weight of dry toluene is four times of the total amount of SH-EP and PDMS-OH.

SH-EP is obtained by the click reaction, while Si-EP is obtained by mixing raw materials together.
